# Supplementary material for: From food waste to water safety: mango endocarp-derived biogenic carbon dots as a fluorescent probe for real-time chlorine monitoring in pool water
Source: Royal Society of Chemistry journal article supplement (doi:10.1039/d5ew00782h), 2026-01-01
Supplement: d5ew00782h1.pdf [file d5ew00782h1.pdf]

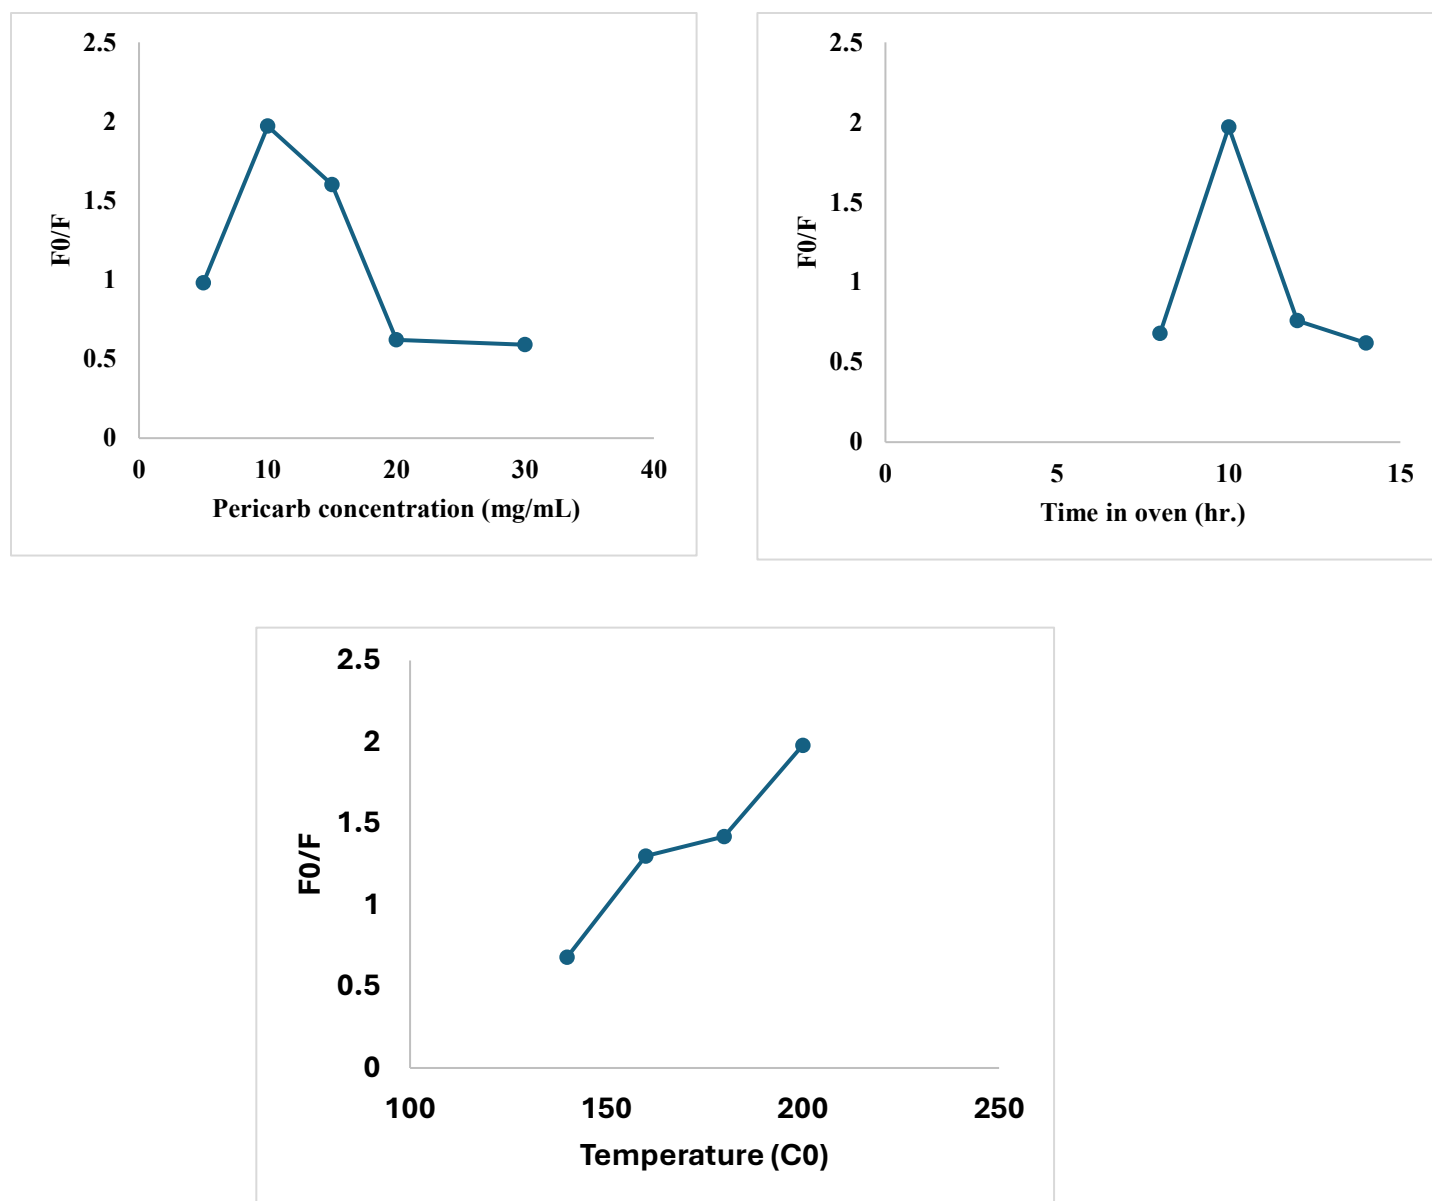

**Figure S1.** Optimization of different parameters affecting C-dots preparation

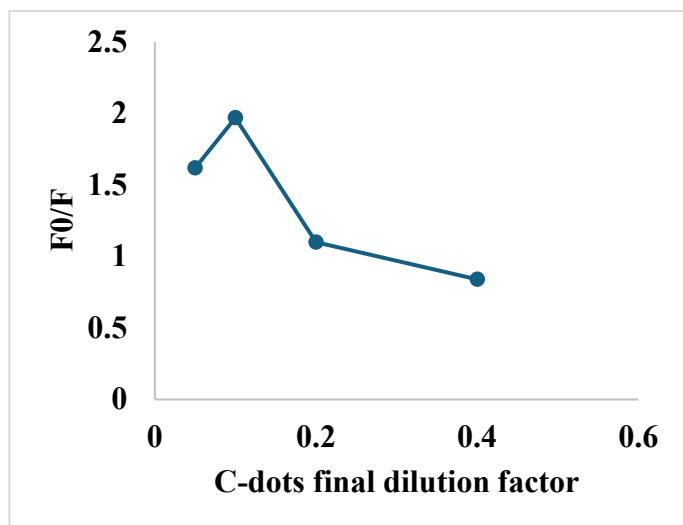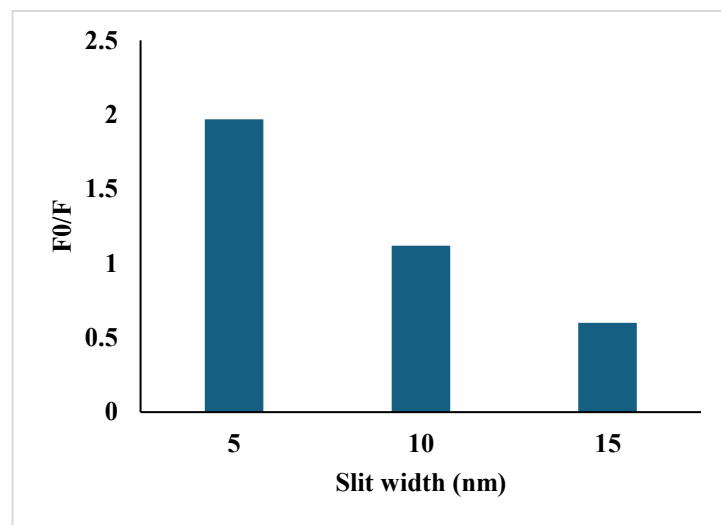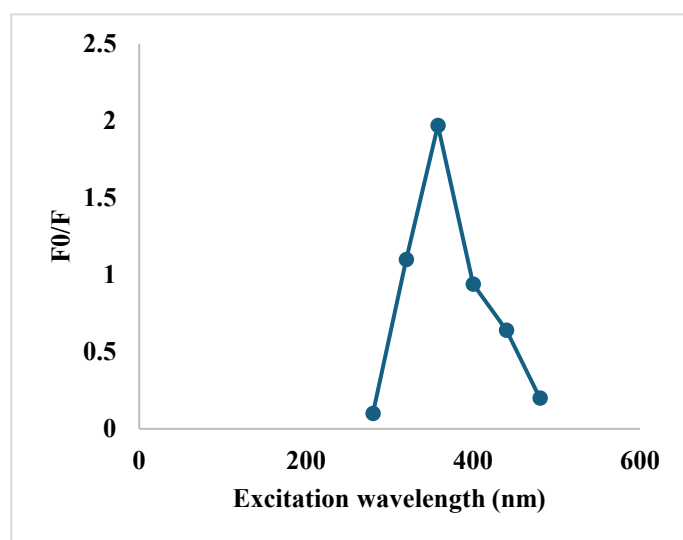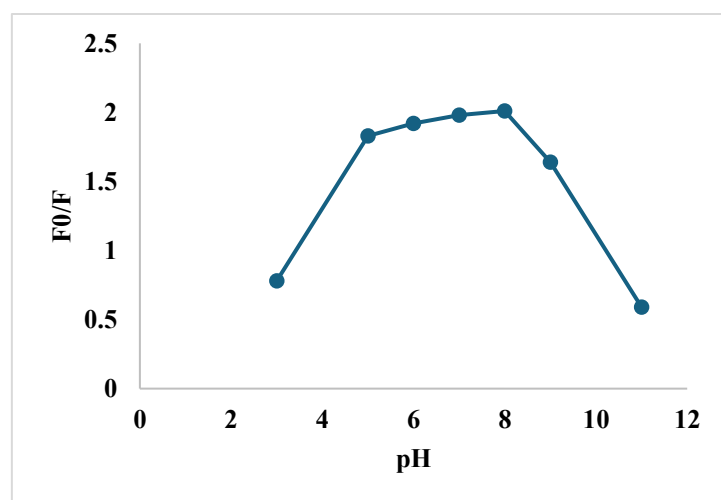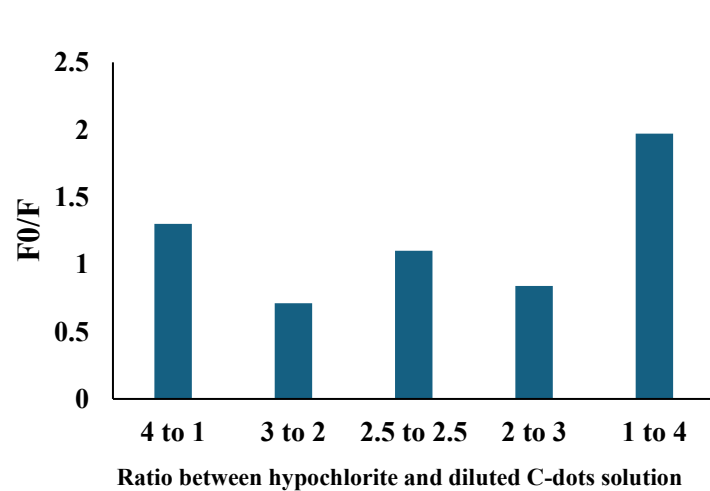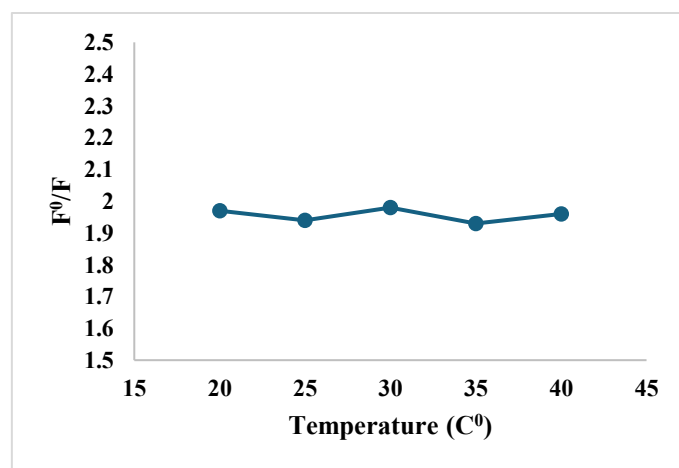

**Figure S2.** Optimization of different parameters affecting measurements of water containing hypochlorite through quenching of the fluorescence of the prepared C-dots

**A**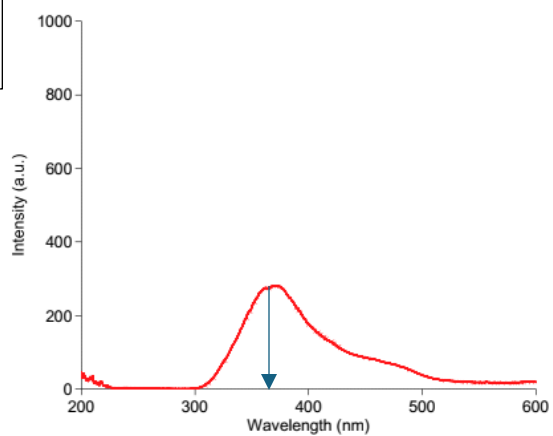

**Excitation spectrum ( $\lambda_{\text{max}}$  excitation = 358 nm)**

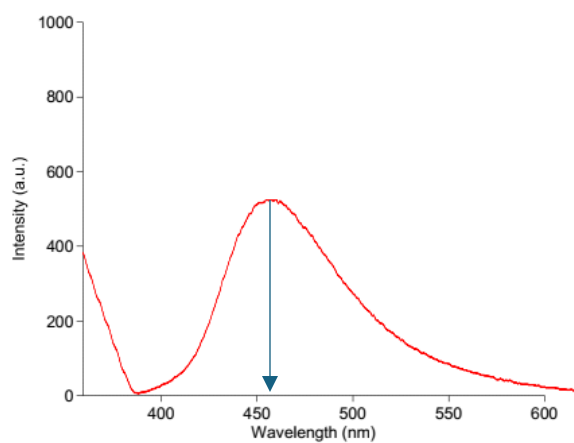

**Emission spectrum ( $\lambda_{\text{max}}$  emission = 460 nm)**

**B**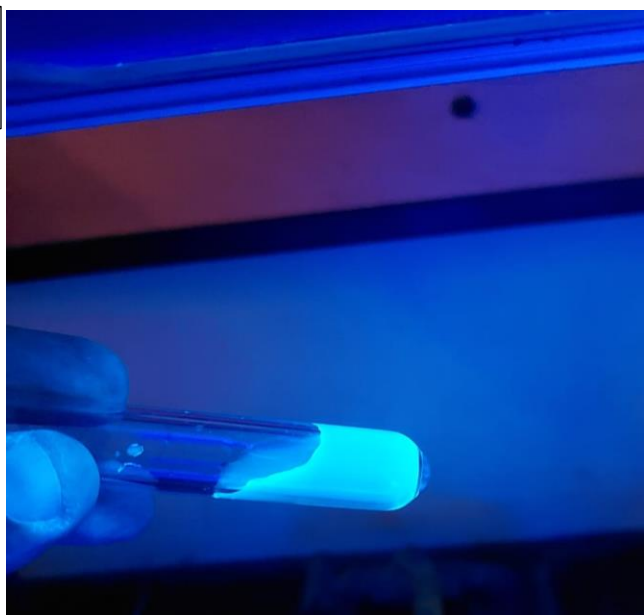

**C-dots solution under UV-lamp 365 nm**

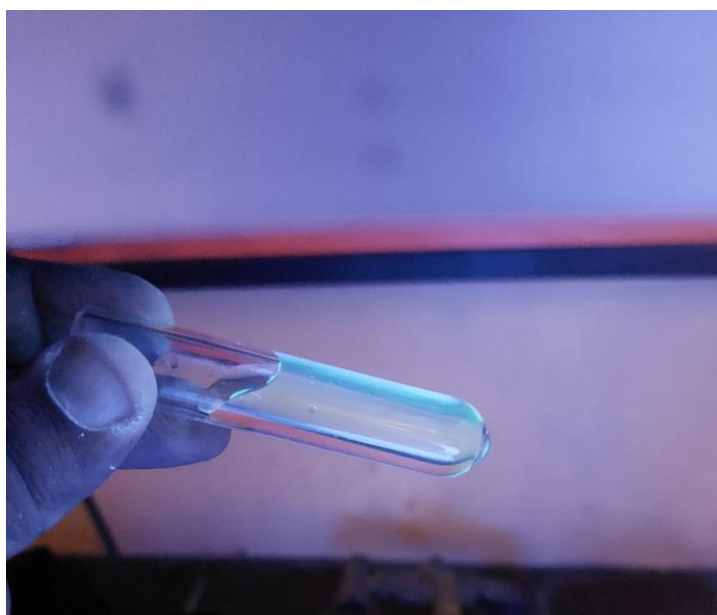

**C-dots solution after addition of water containing hypochlorite under UV-lamp 365 nm**

**Figure S3. A)** Excitation and emission spectra of C-dots solution

**B)** C-dots solution under UV-lamp 365 nm before and after addition of hypochlorite solution.

|                               | Size (d.n...         | % Intensity | Width (d.n... |
|-------------------------------|----------------------|-------------|---------------|
| <b>Z-Average (d.nm): 12.1</b> | <b>Peak 1: 12.12</b> | 100.0       | 15.01         |
| <b>Pdl: 0.171</b>             | <b>Peak 2: 0.000</b> | 0.0         | 0.000         |
| <b>Intercept: 0.507</b>       | <b>Peak 3: 0.000</b> | 0.0         | 0.000         |
| <b>Result quality Good</b>    |                      |             |               |

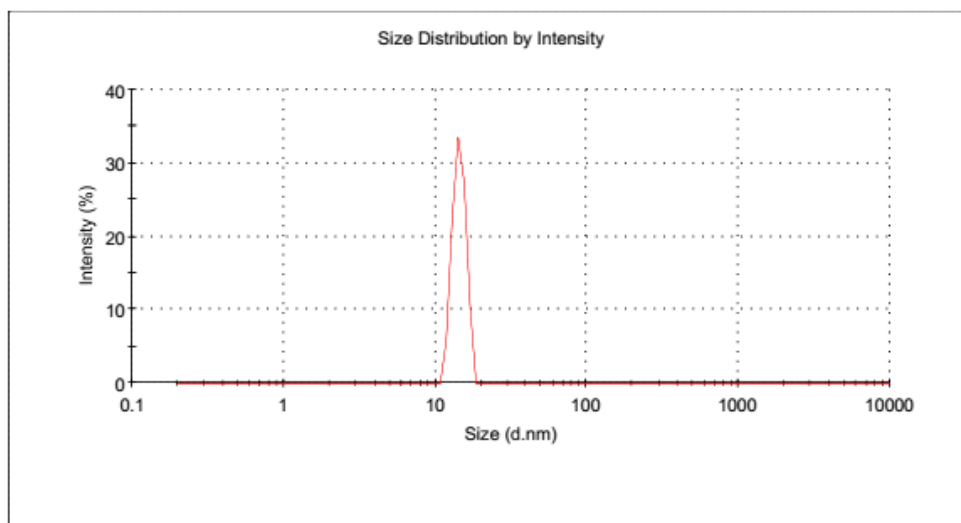

|                                    | Mean (mV)             | Area (%) | Width (mV) |
|------------------------------------|-----------------------|----------|------------|
| <b>Zeta Potential (mV): -37.22</b> | <b>Peak 1: -37.22</b> | 100.0    | 3.68       |
| <b>Zeta Deviation (mV): 3.68</b>   | <b>Peak 2: 0.00</b>   | 0.0      | 0.00       |
| <b>Conductivity (mS/cm): 0.173</b> | <b>Peak 3: 0.00</b>   | 0.0      | 0.00       |
| <b>Result quality Good</b>         |                       |          |            |

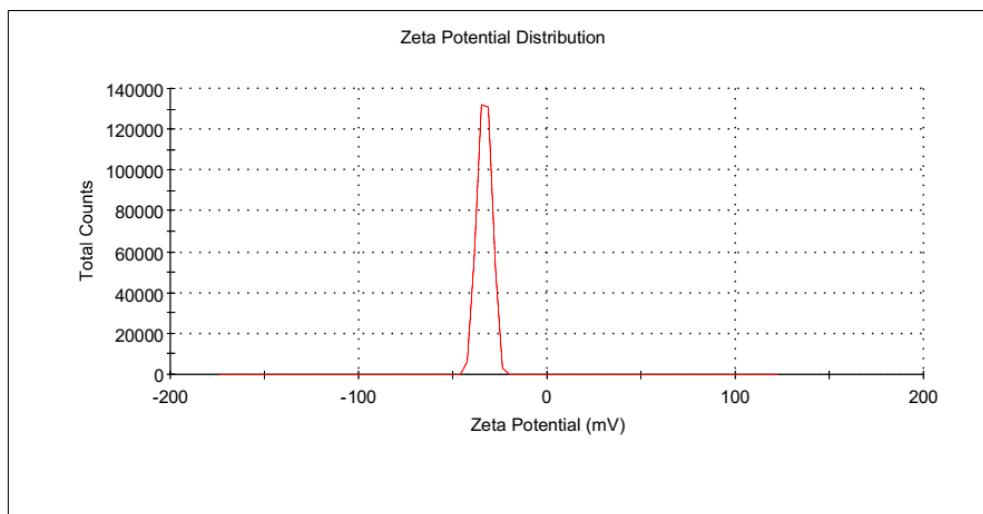

**Figure S4.** A) Dynamic light scattering of particle size of the prepared C-dots using distilled water as a solvent B) Zeta potential measurement for the prepared C-dots.

**A**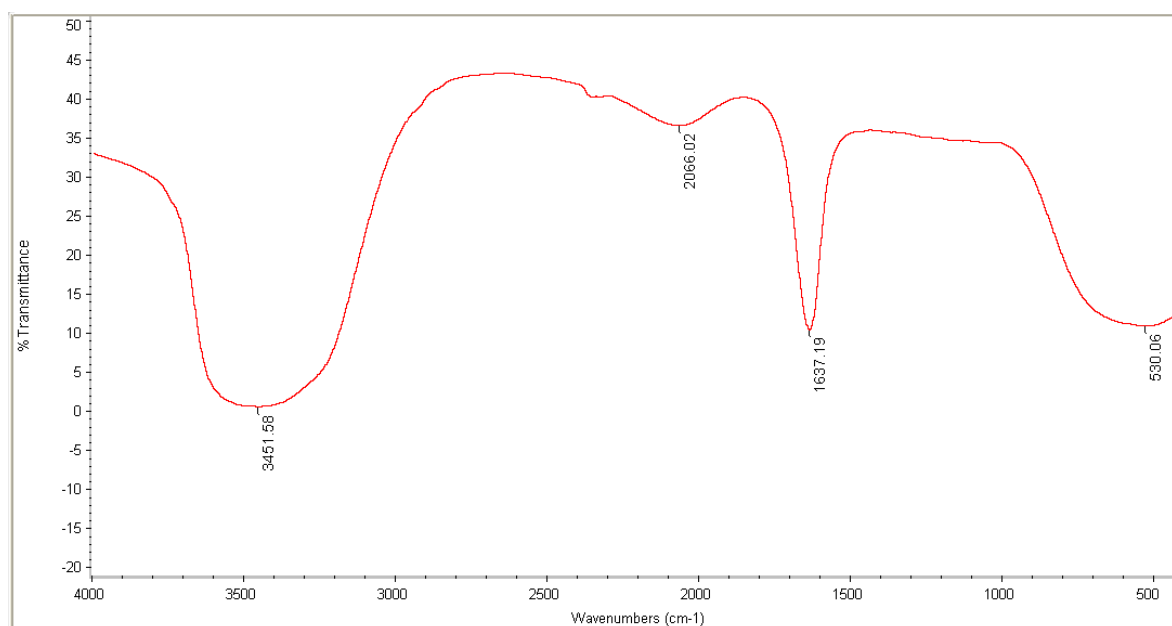**B**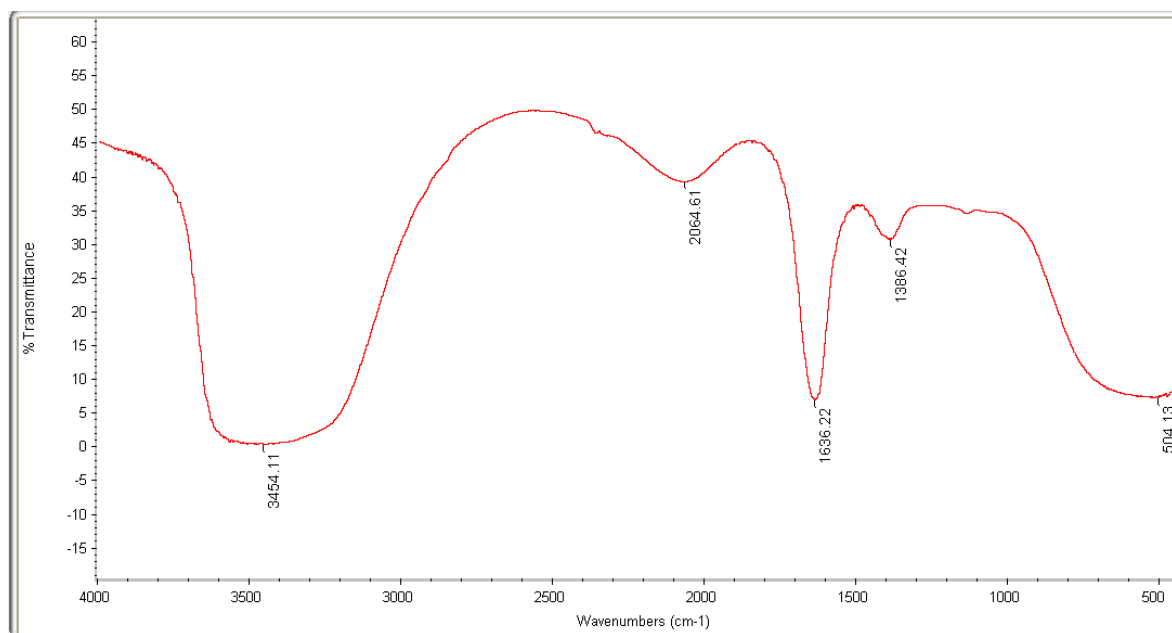

**Figure S5. A)** FT-IR analysis of the prepared C-dots.

**B)** FT-IR analysis of the prepared C-dots after mixing with hypochlorite.

**A**

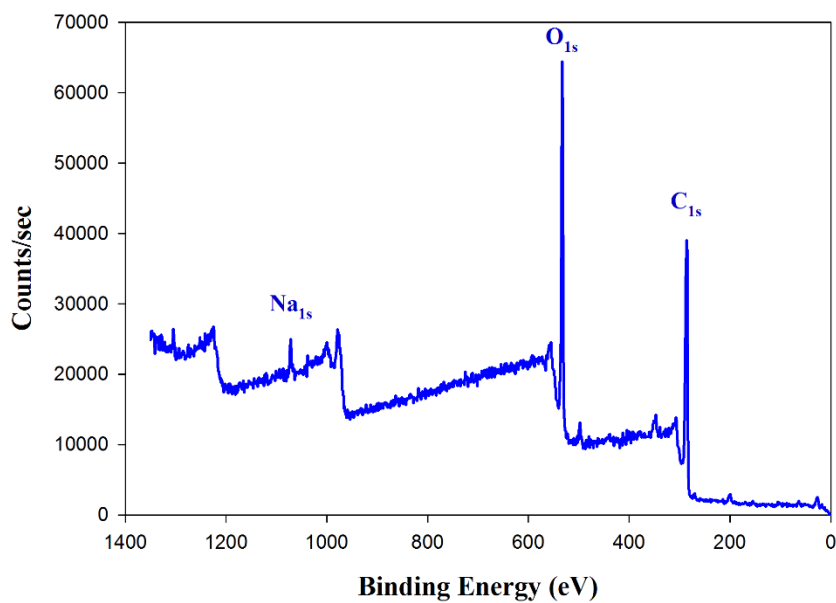

**B**

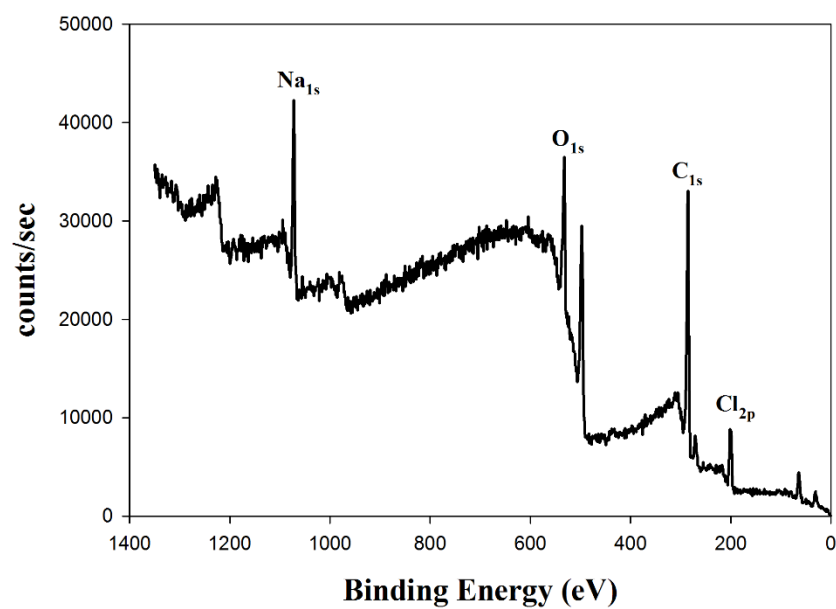

**Figure S6.** X-ray photoelectron spectroscopic analysis for A) the prepared C-dots

B) The prepared C-dots after mixing with hypochlorite.

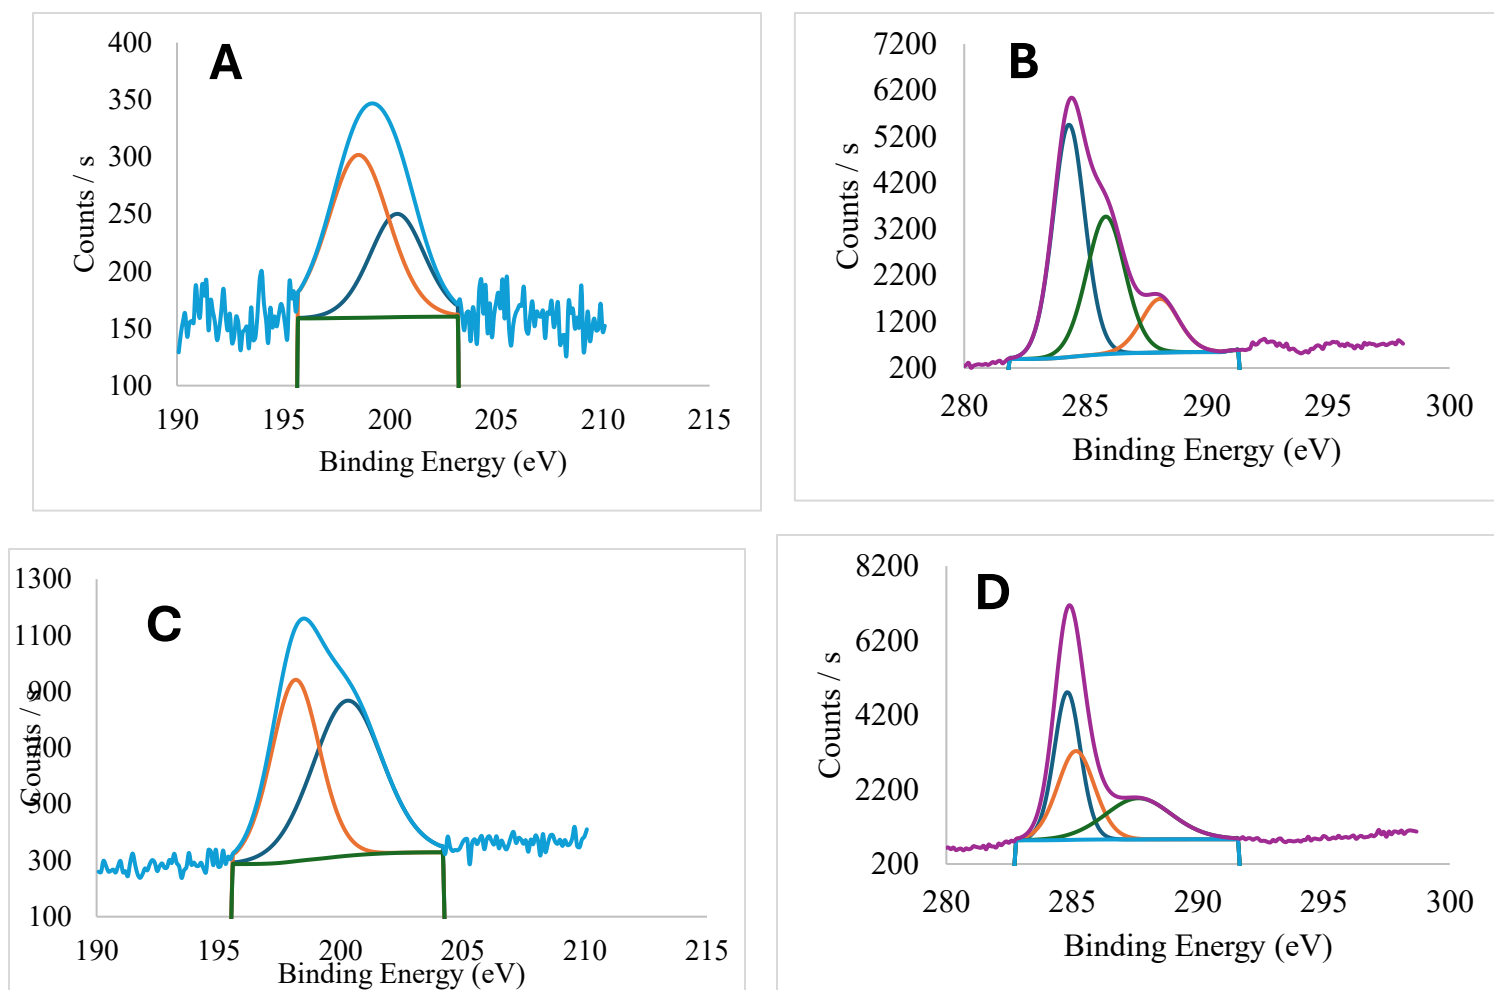

**Figure S7.** High-resolution XPS spectra of the prepared C-dots (Cl 2p and C 1s) before and after hypochlorite exposure. **(A)** Cl 2p (before): peaks at **197.95 eV** (inorganic  $\text{Cl}^-$ ) and **199.88 eV** (surface-bound/partially oxidized Cl). **(B)** C 1s (before): **284.81 eV** ( $\text{C}-\text{C}/\text{C}=\text{C}$ ), **285.15 eV** ( $\text{C}-\text{O}/\text{C}-\text{N}$ ), **287.63 eV** ( $\text{C}=\text{O}/\text{COOH}$ ). **(C)** Cl 2p (after): **199.35 eV** and **200.33 eV** (increased oxidized/adsorbed chlorine species). **(D)** C 1s (after): **284.31 eV** ( $\text{C}-\text{C}/\text{C}=\text{C}$ ), **285.83 eV** ( $\text{C}-\text{O}/\text{C}-\text{N}$ ), **288.07 eV** (increased  $\text{C}=\text{O}/\text{COOH}$ ).

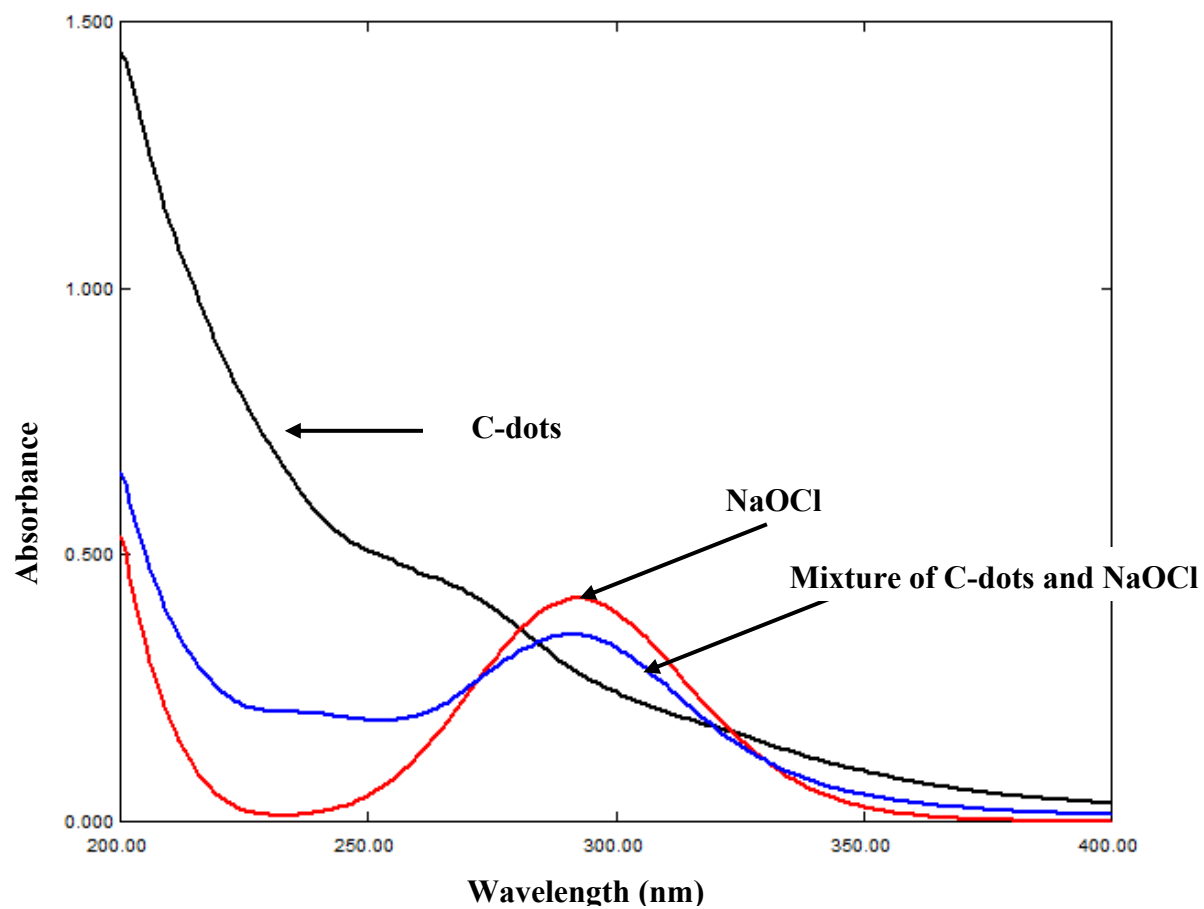

**Figure S8.** UV-visible spectrophotometric analysis showing C-dots (black line), Hypochlorite (red line) and the mixture between hypochlorite and C-dots (blue line).



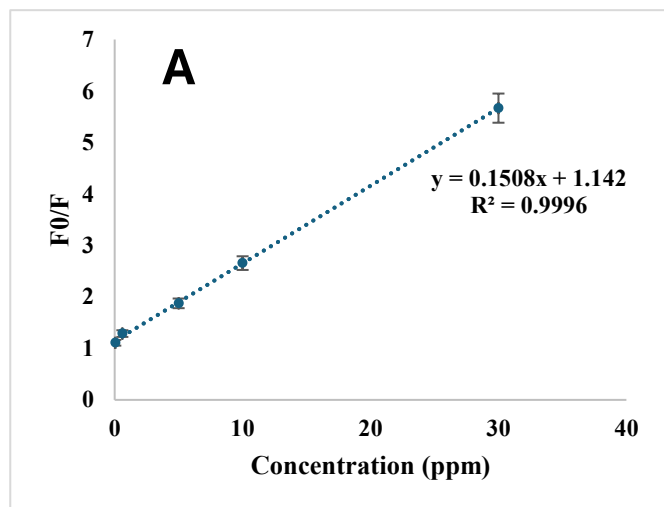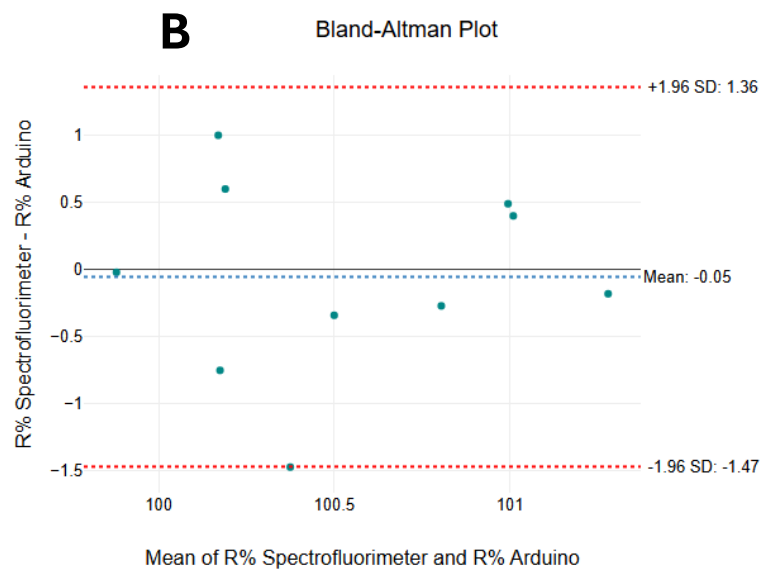

**Figure S9. (A)** Calibration curve of FQ response against concentration of hypochlorite using Arduino based portable device. **(B)** Bland–Altman plot showing the comparison between the Arduinos based device readings and the conventional spectrofluorometer.

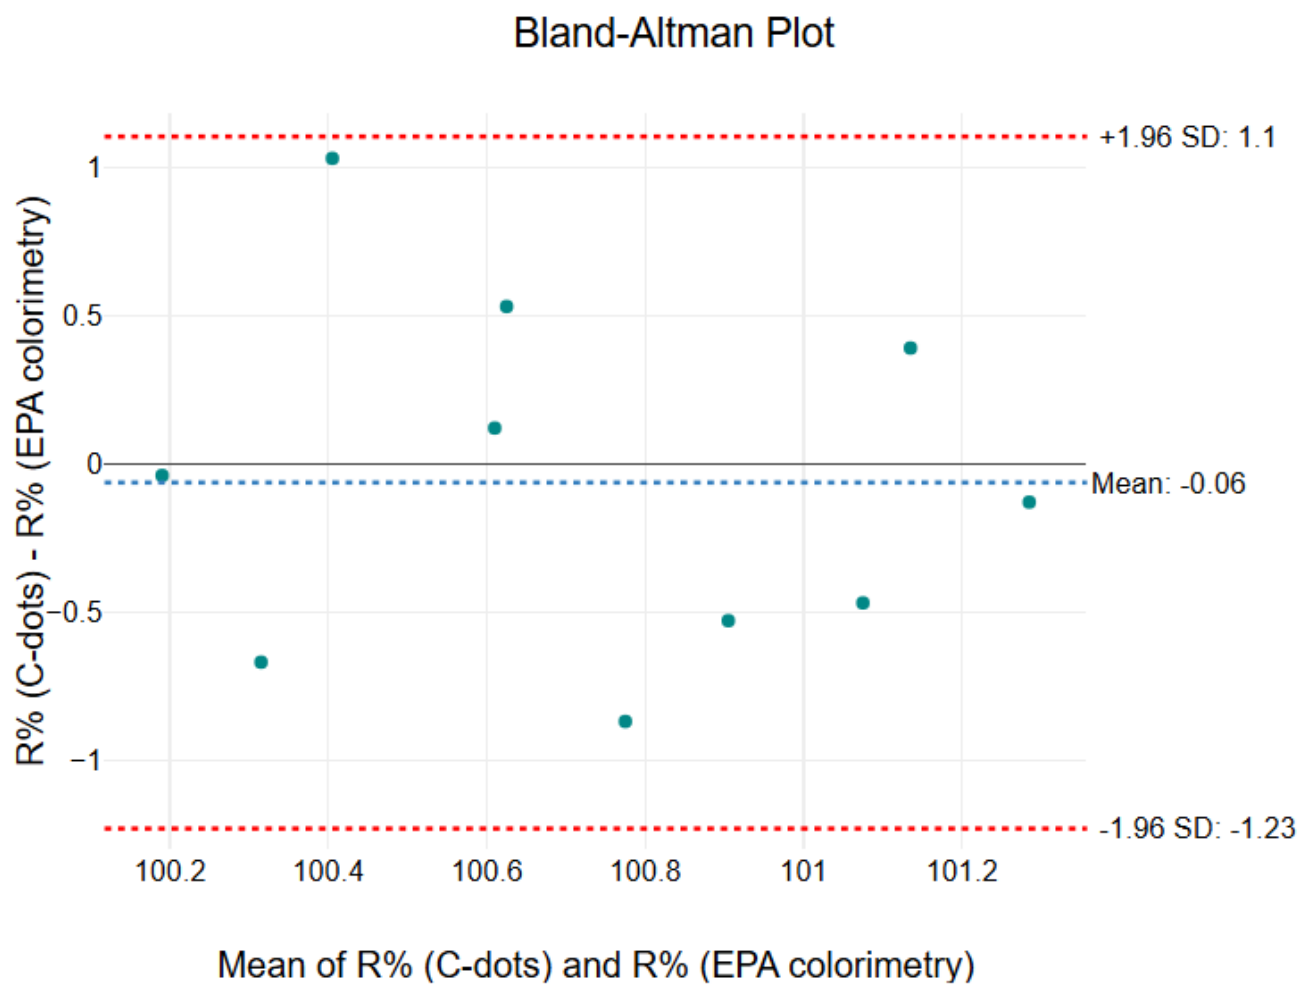

**Figure S10.** Bland–Altman plot showing the agreement between C-dots and EPA colorimetric methods

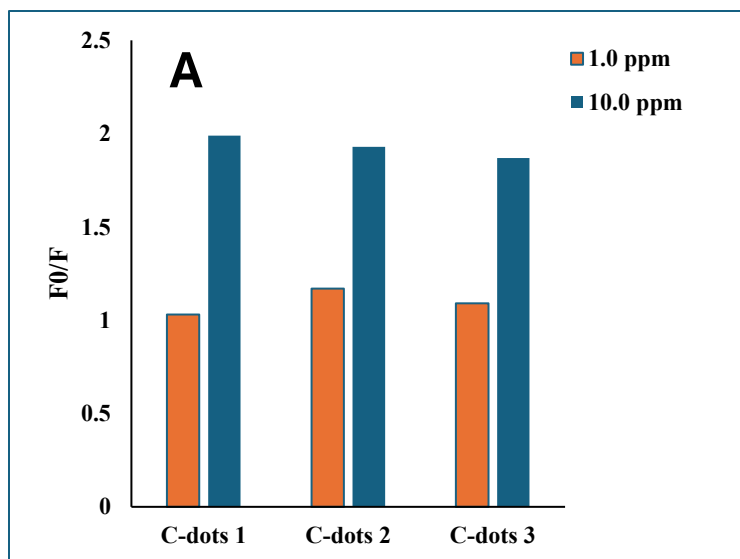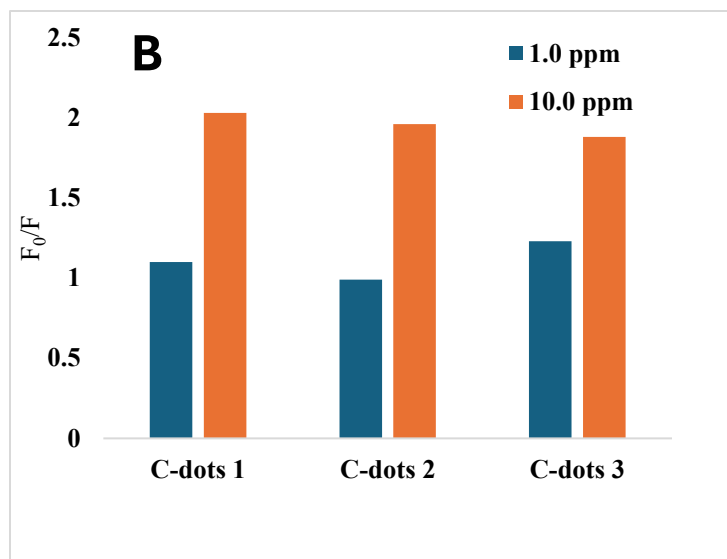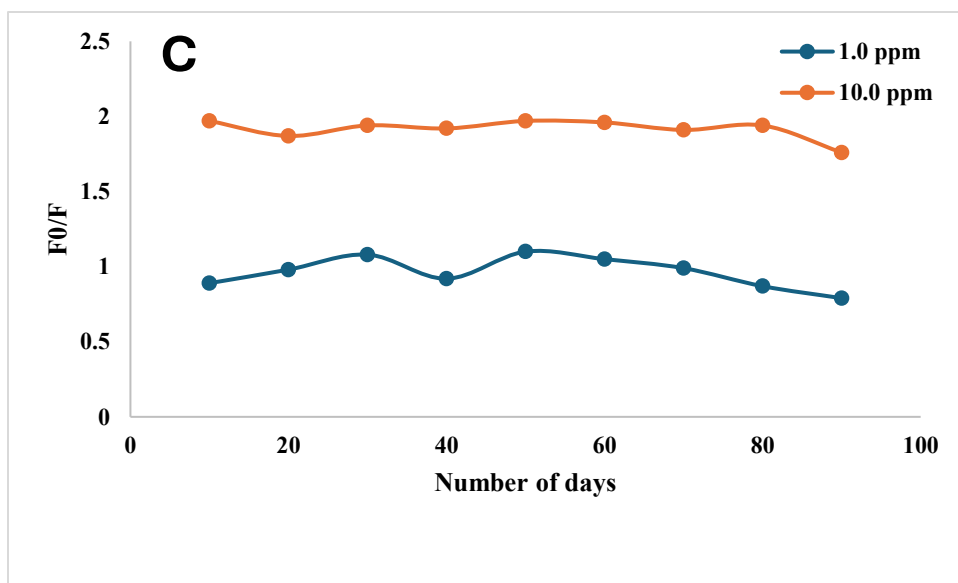

**Figure S11.** Diagrammatic illustration for (a): intra-batch, (b): inter-batch reproducibility of C-dots preparation and (c) Sensor stability over 3 months

**Table S1.** Statistical comparison between the standard EPA colorimetric method (4500 Cl-G) and the proposed method for NaOCl determination in pool water sample.

| Parameter                                                             | Proposed method | EPA colorimetric method |
|-----------------------------------------------------------------------|-----------------|-------------------------|
| Recovery after standard addition techniques<br>(0.30 ppm added NaOCl) | 100.18          | 100.04                  |
| S.D.                                                                  | 1.47            | 1.29                    |
| n                                                                     | 5               | 5                       |
| Variance                                                              | 2.16            | 1.66                    |
| Students t-test (2.365)                                               | 1.29            | ----                    |
| F value (6.39)                                                        | 1.60            | ----                    |

**Table S2.** Statistical comparison between the reported and the proposed method for NaOCl determination in pool water sample.

| Parameter                                                             | Proposed method | Reported method [20] |
|-----------------------------------------------------------------------|-----------------|----------------------|
| Recovery after standard addition techniques<br>(0.30 ppm added NaOCl) | 100.18          | 100.30               |
| S.D.                                                                  | 1.47            | 1.68                 |
| n                                                                     | 5               | 5                    |
| Variance                                                              | 2.1609          | 2.822                |
| Students t-test (2.365)                                               | 0.098           | ----                 |
| F value (6.39)                                                        | 1.655           | ----                 |

[20] X. Ma, Q. Hu, J. Yuan, Y. Feng, Z. Cheng, Glutathione Modified silicon-doped Carbon Quantum dots as a Sensitive Fluorescent Probe for ClO<sup>-</sup> Detection, Journal of Fluorescence 35 (2025) 3529-3538. 10.1007/s10895-024-03797-4.
